# Supplementary material
Source: HighWire-hosted journal article supplement (https://genome.cshlp.org/content/suppl/2003/02/03/13.2.244)
Supplement: 3.pdf [file 3.pdf]

## Cellular Composition:

To determine a detailed list of the cellular components of *Saccharomyces cerevisiae*, chemical composition of *S. cerevisiae* from a glucose limited continuous culture determined by Schulze was used (Table 8.3, Schulze 1995). Since the optimal solution has shown not to be sensitive to the biomass composition (Varma, 1995), the cellular composition at dilution rate of  $0.1 \text{ h}^{-1}$  was chosen for this analysis.

**Table 1.** Cellular composition of *S. cerevisiae* from a glucose limited anaerobic continuous culture (adopted from Schulze, 1995).

| D=0.1               | Cellular content %(w/w) |
|---------------------|-------------------------|
| Protein             | 45.0                    |
| Glycogen            | 8.4                     |
| Trehalose           | 0.8                     |
| Mannan              | 13.1                    |
| Other carbohydrates | 18.4                    |
| RNA                 | 6.3                     |
| DNA                 | 0.4                     |
| Free amino acids    | 1.1                     |
| Lipid               | 2.9                     |
| Ash                 | 5.0                     |
| Sum                 | 101.4                   |

For protein and nucleotide content of the cell, the monomer composition of the cell tabulated by Bruinenberg et. al. (1983) was used. The values are shown in Table 2. Free amino acid composition was not taken into account since it composes a very small portion of the total cell and it is most likely has been already accounted for in the amino acid monomer composition which Bruinenberg has reported in his paper.

**Table 2.** Amino acid and ribonucleotide monomer composition of *S. cerevisiae* (adopted from Oura, 1972, Bruinenberg, 1983).

### Amino acid and RNA monomer composition

| Monomer | mmol/gDW | Monomer | mmol/gDW |
|---------|----------|---------|----------|
| ALA     | 0.459    | MET     | 0.051    |
| ARG     | 0.161    | PHE     | 0.134    |
| ASN     | 0.102    | PRO     | 0.165    |
| ASP     | 0.297    | SER     | 0.185    |
| CYS     | 0.007    | THR     | 0.191    |
| GLN     | 0.105    | TRP     | 0.028    |
| GLU     | 0.302    | TYR     | 0.102    |
| GLY     | 0.290    | VAL     | 0.265    |
| HIS     | 0.066    | AMP     | 0.051    |
| ILE     | 0.193    | GMP     | 0.051    |
| LEU     | 0.296    | UMP     | 0.067    |
| LYS     | 0.286    | CMP     | 0.05     |

The carbohydrate components of the cell are taken to be glycogen, trehalose, mannan, and glucan (see Table 4). The “Other carbohydrates” in this table are assumed to be composed solely of glucan since chitin constitutes a very small portion of the cell composition (Farkas, 1982). Glycogen, mannan, and glucan are taken as polyglucose with a molecular mass of 162 Da (Verduyn, 1990b).

**Table 3.** Deoxyribonucleotide composition of *S.cerevisiae*. The composition was calculated assuming a G + C content of 40.3. mol % (Vaughan-Martini, 1993).

| DNA  | Content %(mol/mol) | MW (g/mol) | Content %(w/w) | mmol/gDW |
|------|--------------------|------------|----------------|----------|
| dAMP | 0.298              | 349.23946  | 0.313          | 0.0036   |
| dCMP | 0.202              | 307.19926  | 0.187          | 0.0024   |
| dGMP | 0.202              | 347.22366  | 0.211          | 0.0024   |
| dTMP | 0.298              | 322.21086  | 0.289          | 0.0036   |

**Table 4.** Carbohydrate composition in *S. cerevisiae* (the first two columns are adopted from Schulze, 1995).

| Carbohydrates                | Cellular content %(w/w) | MW (g/mol) | mmol/gDW |
|------------------------------|-------------------------|------------|----------|
| Glycogen                     | 8.4                     | 162        | 0.52     |
| Trehalose                    | 0.8                     | 342.3      | 0.02     |
| Mannan                       | 13.1                    | 162        | 0.81     |
| Other carbohydrates (glucan) | 18.4                    | 162        | 1.14     |

The molecular mass of each component of the carbohydrate was calculated as follows:

Carbohydrate content (mmol/gcell) = cellular content of each carbohydrate (g/gcell) \* 1/(MW of the carbohydrate (g/mol)) \* 1000 mmol/mol

For example:

Glycogen (mmol/gcell) = 0.084 (g/gcell) \* 1/162 (g/mol) \* 1000 = 0.52 mmol/gcell

The lipid composition is assumed to be as follows (taken from Schulze 1995, Table 3.2):

**Table 5.** Lipid components of *S. cerevisiae* (the first two columns are adopted from Schulze, 1995).

| Lipid                       | Content %(w/w Lipid) | MW (g/mol) | mmol/gDW |
|-----------------------------|----------------------|------------|----------|
| Triacylglycerol             | 20                   | 867.22     | 0.0066   |
| Monoacylglycerol (artifact) | 8                    | 348.41     | 0.0066   |
| Sterols (ergosterol)        | 1                    | 396.66     | 0.007    |
| Sterol esters (zymestrol)   | 2                    | 384.00     | 0.015    |
| Phospholipids               | 54                   |            |          |

e.g.: Ergosterol: (0.01 g Ergosterol/0.39666 g/mmole)/g Lipid \* 2.9 g Lipid/100g DW = 0.0073 mmole Erg/gDW

The monoacylglycerol was not included in the model since Ratledge and Evans (1989) believe that the measurement of this component is most likely an artifact of extraction. The sterols and sterol esters were assumed to be composed solely of ergosterol (Schulze 1995) and zymestrol (Ratledge, 1989), respectively. The molecular weights are estimated using an average value of the cell's fatty acids based on Table 3.3

from Schulze weighted by the percentage content (see Table 5) added to the core structure of the compound.

**Table 6.** Fatty acid components of *S. cerevisiae* (the first two columns are adopted from Schulze, 1995).

| Fatty Acid | Content %(w/w) | Content (w/w) | Avg MW (g/mol) | Average MW (g/mol) |
|------------|----------------|---------------|----------------|--------------------|
| 10:0       | 1.1            | 0.011         | 171            | 1.881              |
| 12:0       | 4.8            | 0.048         | 199            | 9.552              |
| 14:0       | 8.8            | 0.088         | 227            | 19.976             |
| 16:0       | 26.8           | 0.268         | 255            | 68.34              |
| 16:1       | 16.6           | 0.166         | 253            | 41.998             |
| 18:0       | 6.1            | 0.061         | 283            | 17.263             |
| 18:1       | 25.7           | 0.257         | 281            | 72.217             |
| 18:2<      | 10.1           | 0.101         | 279            | 28.179             |
|            | 100            |               | Average:       | 259.406            |

For instance for triacylglycerol, the core structure has a molecular weight of 89 g/mol. It also has 3 fatty acid chains attach to the core structure which makes its average molecular weight to be 867 g/mol (i.e.  $89 + 3 \times 259.406$ ). For phospholipids, the following data from Henry (1982) was used (p.109):

**Table 7.** Phospholipid content of *S. cerevisiae* (the first two columns are adopted from Henry, 1982).

| Phospholipids | phospholipids (%) | Avg MW (g/mol) | mmol/gDW |
|---------------|-------------------|----------------|----------|
| PA            | 2.5               | 672.57         | 0.0006   |
| PINS          | 28.7              | 850.71         | 0.0053   |
| PS            | 8.0               | 760.66         | 0.0017   |
| PE            | 20.5              | 716.65         | 0.0048   |
| PC            | 29.2              | 758.73         | 0.006    |

e.g.  $(2.5 \text{ g PA}/100 \text{ g PL}) \times (54 \text{ g PL}/100 \text{ g Lipid}) \times (2.9 \text{ g Lipid}/100 \text{ g DW}) \times (1/0.74281 \text{ g/mmol}) = 0.00058$

The average molecular weight of fatty acids was also used here to determine the average molecular weight of phospholipids.

Energy required for polymerization of macromolecules was calculated using the macromolecule content of the cell and ATP requirement for biosynthesis of polymers during growth (Verduyn, 1991).

**Table 8.** Energy requirement for polymerization of macromolecules during growth (Verduyn, 1991).

|               | Cellular content<br>(w/w) | Polymerization Energy                |                             |
|---------------|---------------------------|--------------------------------------|-----------------------------|
|               |                           | Per Molecule<br>(mmol ATP/g polymer) | Total<br>(mmol ATP/ g cell) |
| Protein       | 45                        | 37.7                                 | 16.965                      |
| Carbohydrates | 40.7                      | 12.8                                 | 5.2096                      |
| RNA           | 6.3                       | 26.0                                 | 1.638                       |
| DNA           | 0.4                       | 26.0                                 | 0.104                       |
| Sum           |                           |                                      | 23.9166                     |

The overall cell composition is therefore as follows:

**Table 9.** Cellular components of *S. cerevisiae*

|     |       |          |         |
|-----|-------|----------|---------|
| ALA | 0.459 | CMP      | 0.05    |
| ARG | 0.161 | dAMP     | 0.0036  |
| ASN | 0.102 | dCMP     | 0-0024  |
| ASP | 0.297 | dGMP     | 0.0024  |
| CYS | 0.007 | DTMP     | 0.0036  |
| GLU | 0.302 | TAGLY    | 0.007   |
| GLN | 0.105 | ERGOST   | 0.0007  |
| GLY | 0.290 | ZYMST    | 0.015   |
| HIS | 0.066 | PA       | 0.0006  |
| ILE | 0.193 | PINS     | 0.005   |
| LEU | 0.296 | PS       | 0.002   |
| LYS | 0.286 | PE       | 0.005   |
| MET | 0.051 | PC       | 0.006   |
| PHE | 0.134 | GLYCOGEN | 0.519   |
| PRO | 0.165 | TRE      | 0.023   |
| SER | 0.185 | Mannan   | 0.809   |
| THR | 0.191 | 13GLUCAN | 1.136   |
| TRP | 0.028 | SLF      | 0.02    |
| TYR | 0.102 | ATP      | 23.9166 |
| VAL | 0.265 | ADP      | 23.9166 |
| AMP | 0.051 | PI       | 23.9456 |
| GMP | 0.051 | Biomass  | 1       |
| UMP | 0.067 |          |         |

## References:

1. Schulze, U. (1995) *Anaerobic physiology of Saccharomyces cerevisiae*. Ph.d. thesis, Technical University of Denmark.
2. Varma, A.; Palsson, B. O. Parametric sensitivity of stoichiometric flux balance models applied to wildtype *Escherichia coli* metabolism. *Biotechnol. Bioeng.* 1995, 45, 69-79.
3. Oura, E. (1972) *The effect of aeration on the growth energetics and biochemical composition of baker's yeast with appendix: reactions leading to the formation of yeast cell material from glucose and ethanol*. Ph.D. thesis. Helsinki University, Helsinki, Finland.
4. Bruinenberg, P. M., van Dijken, J. P. & Scheffers, W. A. (1983). A theoretical analysis of NADPH production and consumption in yeasts. *Journal of General Microbiology* 129, 953-964.
5. Farkas, V. (1989). Polysaccharide metabolism. In *The Yeasts. Vol. 3. Metabolism and physiology of yeasts*, pp. 317-366. Edited by A. H. Rose & J. S. Harrison. London: Academic Press.
6. Verduyn, C; Postma, E; Scheffers, WA; van Dijken, JP. Energetics of *Saccharomyces cerevisiae* in anaerobic glucose-limited chemostat cultures. *Journal of General Microbiology*, 1990 Mar, 136 ( Pt 3):405-12.
7. Ratledge, C. & Evens, C. T. (1989). Lipids an their metabolism. *In the Yeasts. Vol. 3. Metabolism and physiology of yeasts*, pp. 367-455. Edited by A. H. Rose & J. S. Harrison. London: Academic Press.
8. Henry, S. A. Membrane lipids of yeast: biochemical and genetic studies. In the molecular biology of the yeast *Saccharomyces*: metabolism and gene expression, pp. 101-158. Edited by J. N. Strathern, E. W. Jones, & J. R. Broach. New York: Cold Spring Harbor.
9. Vaughan-Martini, A.; Martini, A. (1993) A taxonomic key for the genus *Saccharomyces*. *System. Appl. Microbiol.* 16, 113-119.
10. Verduyn, C. Physiology of yeasts in relation t biomass yields. *Antonie Van Leeuwenhoek*, 1991, 60:325-53.
